# Supplementary material for: Evaluation of Intraligamentous and Intraosseous Computer-Controlled Anesthetic Delivery Systems in Pediatric Dentistry: A Randomized Controlled Trial
Source: MDPI journal article supplement (doi:10.3390/children10010079), 2022-12-30
Supplement: s1 [file s1]

**Table S1.** Computer delivery system-intraligamentary anesthesia versus inferior alveolar nerve block with conventional syringe. Strength of the relationship in the proposed model between exposure to a considered risk factor (covariates of the first column) and the outcome variables (first row).

|                          | Pain due to the anesthesia injection <sup>a</sup> | Physical reaction during the anesthesia injection <sup>b</sup> | Anesthetic reinforcement               | Pain during the therapeutic procedure <sup>a</sup> |
|--------------------------|---------------------------------------------------|----------------------------------------------------------------|----------------------------------------|----------------------------------------------------|
| <b>Sex</b>               | ns                                                | ns                                                             | ns                                     | OR=3.800<br>CI=1.056–13.740<br>p=0.040             |
| <b>Age</b>               | ns                                                | ns                                                             | OR=3.954<br>CI=0.911–17.104<br>p<0.001 | ns                                                 |
| <b>Dental procedure</b>  | ns                                                | ns                                                             | ns                                     | ns                                                 |
| <b>Anesthesia system</b> | OR=6.410<br>CI=1.723–23.817<br>p=0.010            | EC=1.125<br>SE=0.222<br>p<0.001                                | ns                                     | ns                                                 |

**Table S1.** (continue).

|                          | Overall behavior during the visit <sup>c,d</sup> | Postoperative morbidity                               | Type of postoperative complication <sup>e</sup> |
|--------------------------|--------------------------------------------------|-------------------------------------------------------|-------------------------------------------------|
| <b>Sex</b>               | ns                                               | ns                                                    | ns                                              |
| <b>Age</b>               | ns                                               | ns                                                    | ns                                              |
|                          |                                                  | <sup>f</sup> ns                                       |                                                 |
| <b>Dental procedure</b>  | ns                                               | <sup>g</sup> OR=11.580<br>CI=1.421–94.473<br>p=0.02   | ns                                              |
|                          |                                                  | <sup>h</sup> OR=14.490<br>CI=1.301–161.954<br>p=0.033 |                                                 |
| <b>Anesthesia system</b> | ns                                               | OR=14.661<br>CI=2.697–79.903<br>p<0.001               | OR=3.980<br>CI=0.991–15.957<br>p=0.021          |

<sup>a</sup> Recoded Wong-Baker score (binomial); <sup>b</sup> FLACC score (binomial); OR, Odds ratio; ns, not significant; CI, confidence interval; p, p-value; ; EC, estimated coefficient by the model; SE, standard error; <sup>c</sup> Frankl scale; <sup>d</sup> The data correspond to the extreme responses (“highly negative” versus “highly positive”); <sup>e</sup> The model is only reliable regarding “discomfort” versus “without complications” (not applicable with relation to “pain” or to “nibbling injuries”); <sup>f</sup> very deep versus deep fillings; <sup>g</sup> pulpotomies versus deep fillings ; <sup>h</sup> extractions versus deep fillings

**Table S2.** Computer delivery system-intraosseous anesthesia versus inferior alveolar nerve block with conventional syringe. Strength of the relationship in the proposed model between exposure to a considered risk factor (covariates) and the outcome variables (first row).

|                          | Pain due to the anesthesia injection <sup>a</sup> | Physical reaction during the anesthesia injection <sup>b</sup> | Anesthetic reinforcement | Pain during the therapeutic procedure <sup>a</sup> |
|--------------------------|---------------------------------------------------|----------------------------------------------------------------|--------------------------|----------------------------------------------------|
| <b>Sex</b>               | ns                                                | ns                                                             | ns                       | ns                                                 |
| <b>Age</b>               | ns                                                | EC= -0.423<br>SE=0.154<br>p=0.008                              | ns                       | ns                                                 |
| <b>Dental procedure</b>  | ns                                                | ns                                                             | ns                       | ns                                                 |
| <b>Anesthesia system</b> | OR=0.107<br>CI=0.012–0.950<br>p=0.045             | EC=-1.680<br>SE=0.639<br>p=0.011                               | ns                       | ns                                                 |

**Table S2.** (continue).

|                          | Overall behavior during the visit <sup>c,d</sup> | Postoperative morbidity               | Type of postoperative complication <sup>e</sup> |
|--------------------------|--------------------------------------------------|---------------------------------------|-------------------------------------------------|
| <b>Sex</b>               | ns                                               | ns                                    | ns                                              |
| <b>Age</b>               | ns                                               | ns                                    | ns                                              |
| <b>Dental procedure</b>  | ns                                               | ns                                    | ns                                              |
| <b>Anesthesia system</b> | ns                                               | OR=0.306<br>CI=0.094–0.992<br>p=0.048 | OR=1.473<br>CI=0.658–1.894<br>p=0.043           |

<sup>a</sup> Recoded Wong-Baker score (binomial); <sup>b</sup> FLACC score (binomial); ns, not significant; EC, estimated coefficient by the model; SE, standard error; OR, Odds ratio; CI, confidence interval; p, p-value; <sup>c</sup> Frankl scale; <sup>d</sup> The data correspond to the extreme responses (“highly negative” versus “highly positive”); <sup>e</sup> The model is only reliable regarding “discomfort” versus “without complications” (not applicable with relation to “pain” or to “nibbling injuries”)

**Figure S1.** Flow chart of the patient selection.

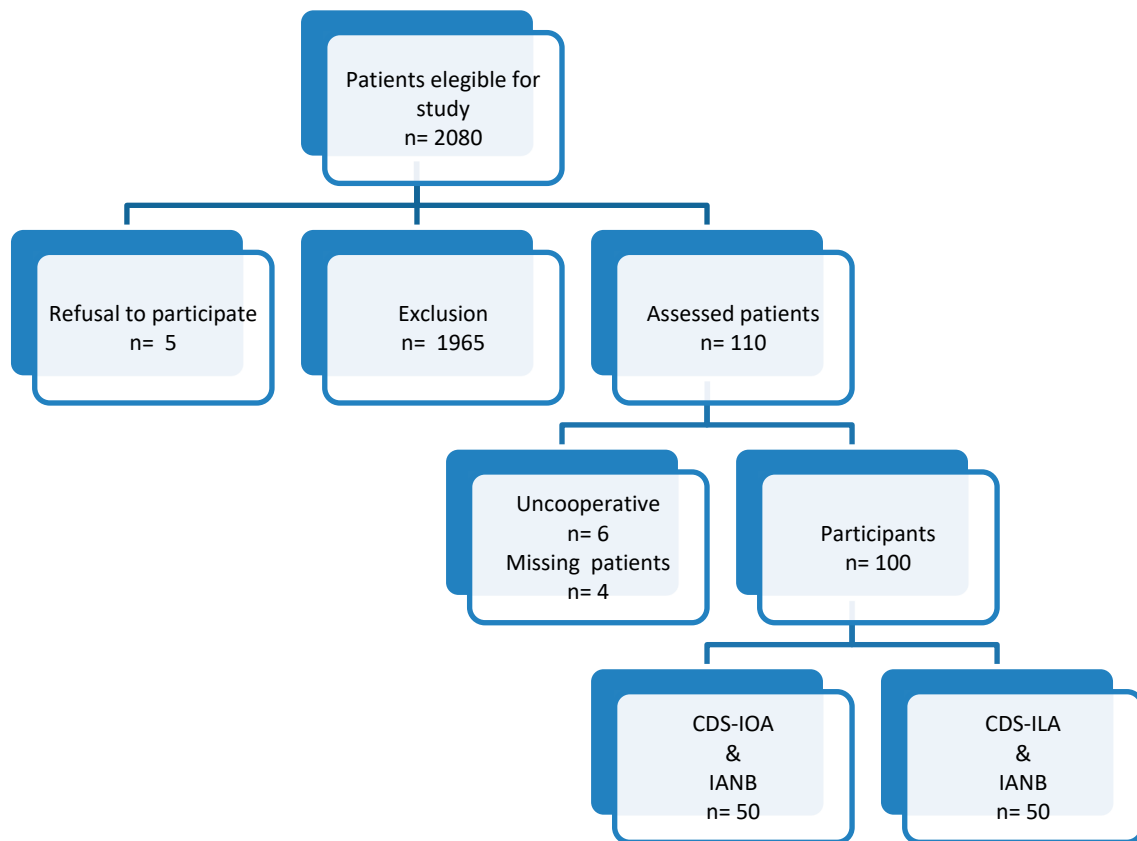

CDS-ILA, computer delivery system-intraligamentary anesthesia; CDS-IOA, computer delivery system-intraosseous anesthesia; IANB, inferior alveolar nerve block with conventional syringe.
